# Supplementary material for: The biogeochemical variability of Arctic thermokarst ponds is reflected by stochastic and niche‐driven microbial community assembly processes
Source: PubMed Central journal article supplement (PMC7702111; doi:10.1111/1462-2920.15260), 2020-10-13
Supplement: EMI-22-4847-s001.pdf [file EMI-22-4847-s001.pdf]

## Supporting Information

a)

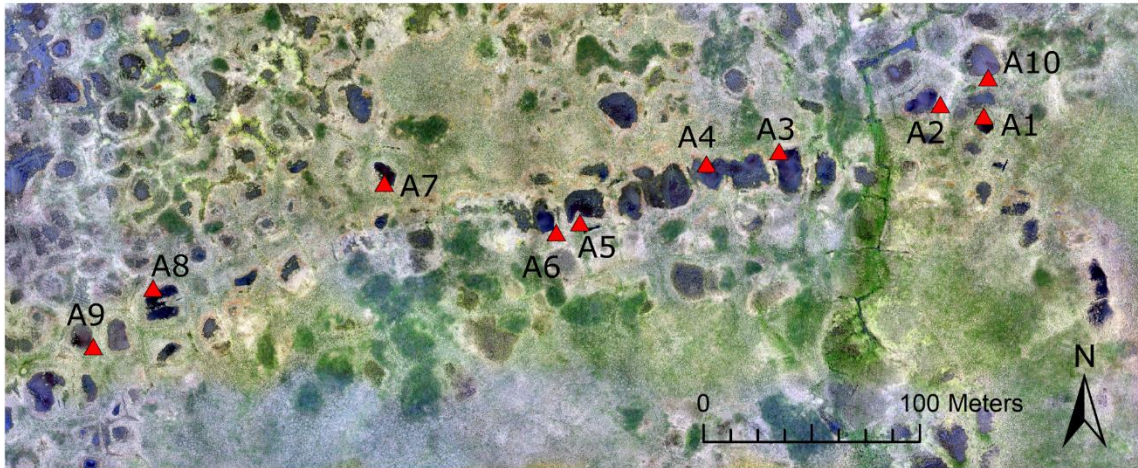

b)

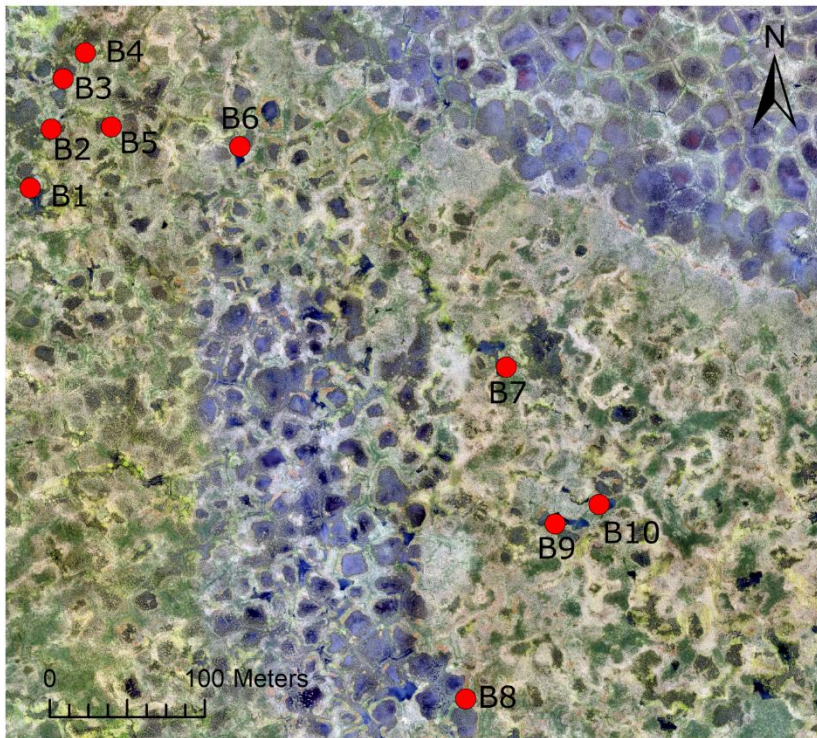

**Figure S1:** Orthomosaic of drone images of a) Site A, b) Site B. Points and label represent individual ponds sampled in this study.

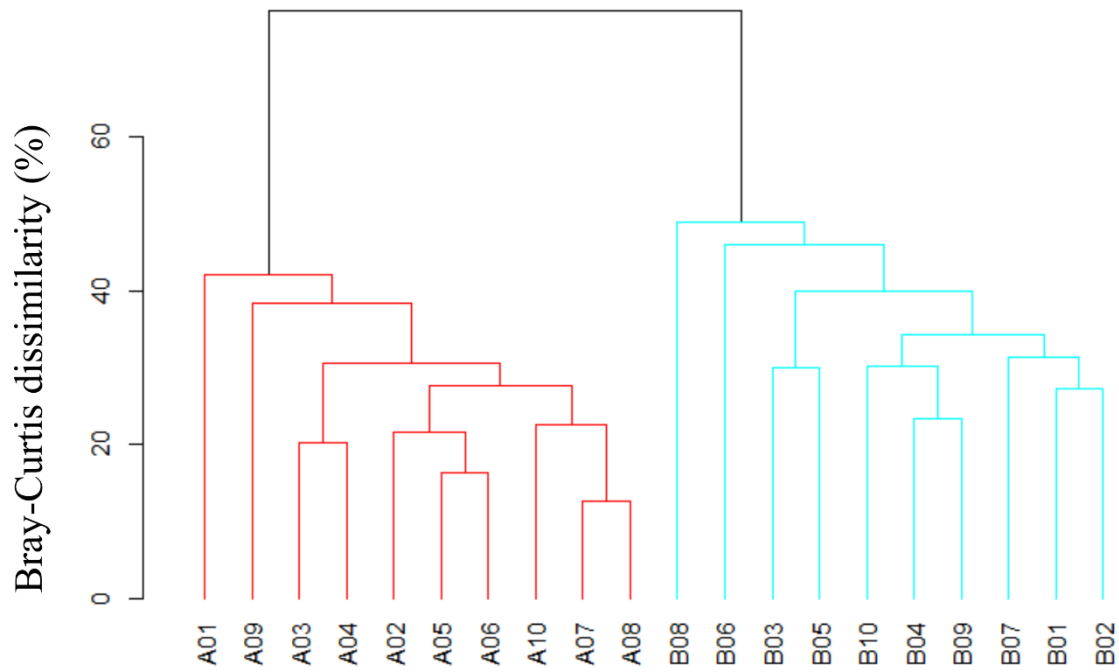

**Figure S2:** Hierarchical agglomerative clustering of the ponds based on the surrounding vegetation (Distance: Bray-Curtis, Agglomeration: average). Colours represent significant clusters detected by similarity profile analysis (Simprof).

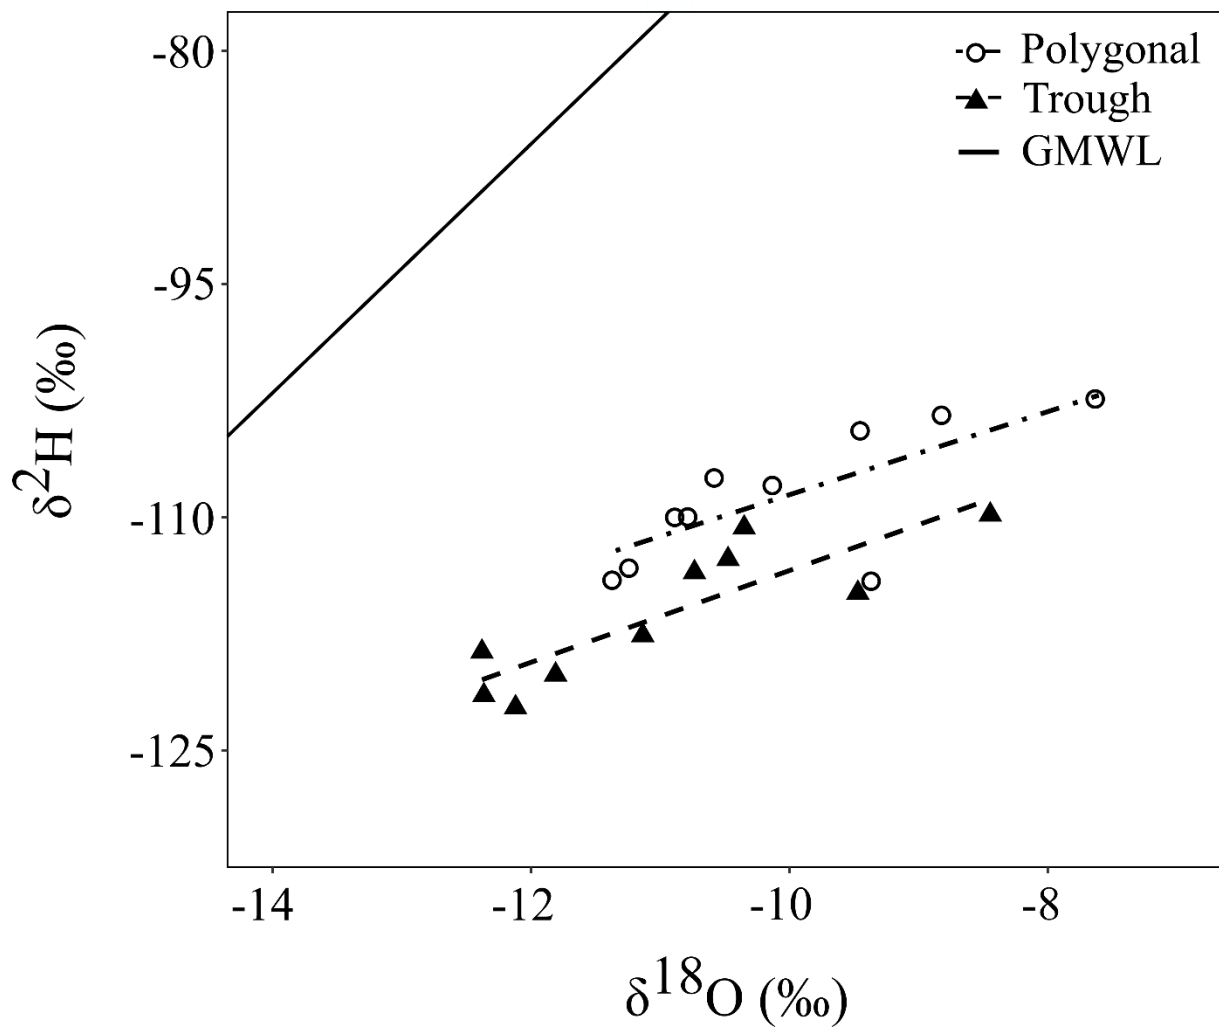

**Figure S3:** Isotopic signature of pond water shown in relation to the Global Meteoric Water Line (GMWL).

**Table S1:** Average read numbers of OTUs that significantly contributed to the difference of the bacterial microbial communities between polygonal and trough ponds (simpler analysis). Only OTUs with a contribution >1 % are shown. Distance: % difference to closest know sequence (accession number).

| OTUs   | Polygonal | Trough | % contribution | p-value | Accession Number | Distance (%) | Phylum         | Genus                         |
|--------|-----------|--------|----------------|---------|------------------|--------------|----------------|-------------------------------|
| OTU 2  | 532.6     | 1505   | 10.36          | 0.003   | MT102304         | 0            | Proteobacteria | <i>Variovorax/RhodoferaX1</i> |
| OTU 4  | 45.5      | 658.75 | 5.40           | 0.001   | AM939566         | 0.7          | Actinobacteria | <i>Candidatus Planktoluna</i> |
| OTU 5  | 596.15    | 9.35   | 5.01           | 0.001   | FPLS01032293     | 0            | Proteobacteria | <i>Alcaligenes</i>            |
| OTU 7  | 105.1     | 542.25 | 4.36           | 0.007   | EU801768         | 0            | Proteobacteria | <i>Limnohabitans</i>          |
| OTU 6  | 32.5      | 471.35 | 3.85           | 0.001   | EU801564         | 0            | Proteobacteria | <i>Limnohabitans</i>          |
| OTU 10 | 441.45    | 2.25   | 3.73           | 0.001   | EU800868         | 0            | Actinobacteria | <i>Rhodoluna</i>              |
| OTU 9  | 315.4     | 1      | 2.67           | 0.001   | JN626726         | 0            | Actinobacteria | <i>Nanopelagicales</i>        |
| OTU 12 | 6.6       | 278.7  | 2.31           | 0.001   | HM319621         | 0            | Proteobacteria | <i>Rhodoblastus</i>           |
| OTU 13 | 220.85    | 1.2    | 1.86           | 0.001   | AJ290032         | 0            | Proteobacteria | <i>Methylorosula</i>          |
| OTU 11 | 204.95    | 75.45  | 1.61           | 0.036   | JN656918         | 0            | Actinobacteria | <i>Rhodoluna</i>              |
| OTU 16 | 132.5     | 0      | 1.12           | 0.001   | CP016780         | 0            | Actinobacteria | <i>Nanopelagicales</i>        |

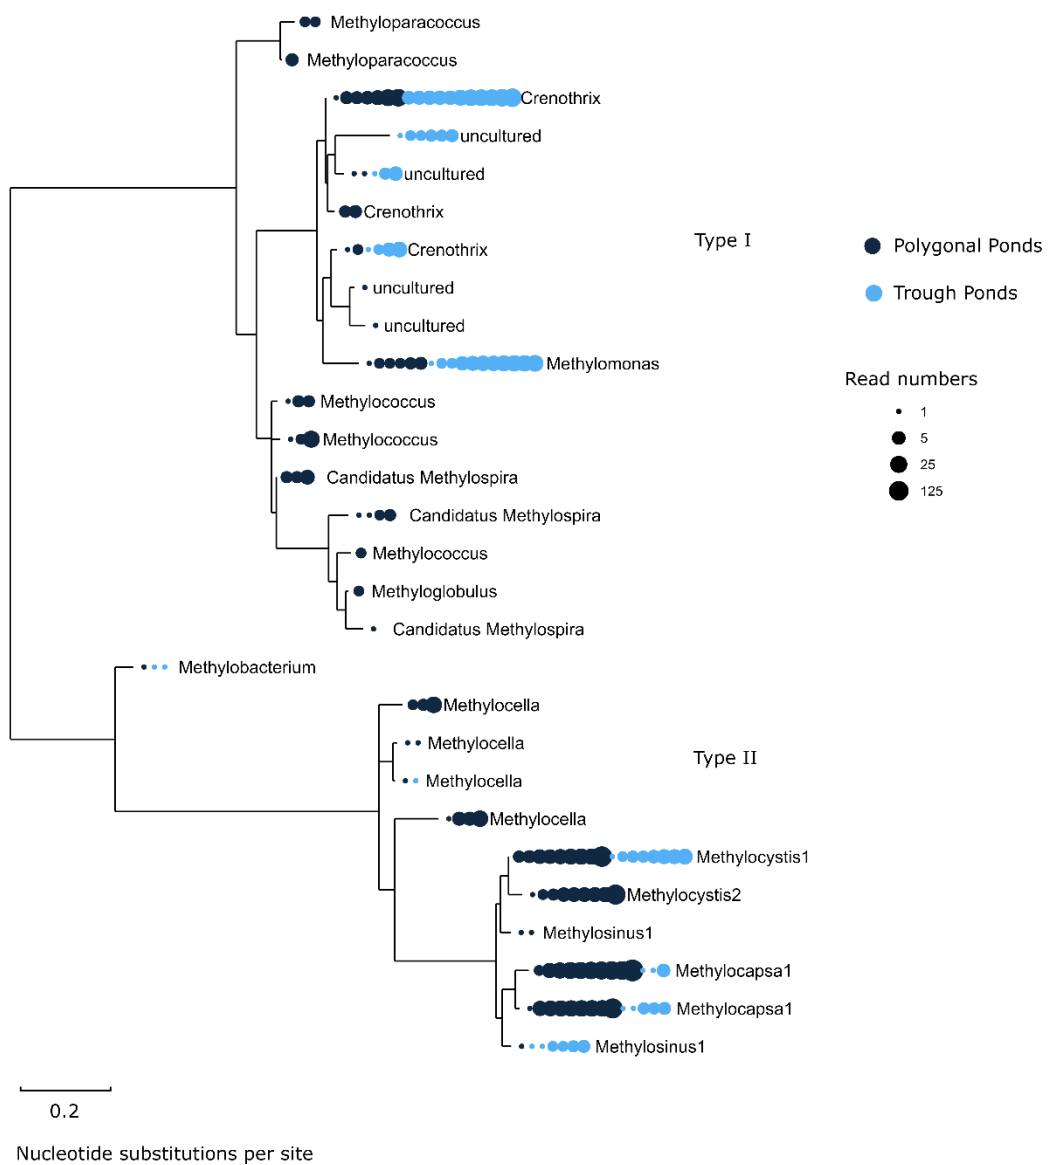

**Figure S4:** Phylogenetic relationship of methanotrophs (Maximum Likelihood method) and their relative abundance in each pond. Each circle represents one pond.

**Table S2:** Average read numbers of OTUs that significantly contributed to the difference of the eukaryotic microbial communities between polygonal and trough ponds (simper analysis). Only OTUs with a contribution >1 % are shown. Distance: % difference to closest know sequence (accession number).

| OTUs   | Polygonal | Trough | % contribution | p-value | Accession Number | Distance (%) | Phylum             | Species                             |
|--------|-----------|--------|----------------|---------|------------------|--------------|--------------------|-------------------------------------|
| OTU 1  | 93.35     | 593.4  | 20.97          | 0.001   | AM051191         | 0            | Cryptophyta        | <i>Cryptomonas marssonii</i>        |
| OTU 5  | 222.95    | 0.05   | 8.23           | 0.001   | JF730783         | 0            | Ochrophyta         | <i>uncultured Uroglena</i>          |
| OTU 6  | 161.15    | 3.85   | 5.89           | 0.001   | GU067811         | 2.9          | Chlorophyta        | <i>uncultured Monomastix</i>        |
| OTU 7  | 0.5       | 141.95 | 5.24           | 0.001   | EF014365         | 15.2         | Blastocladiomycota | <i>Catenaria anguillulae</i>        |
| OTU 4  | 0.65      | 138.2  | 5.09           | 0.001   | GU067821         | 0            | Chlorophyta        | <i>uncultured Chlamydomonadales</i> |
| OTU 10 | 117.15    | 1.85   | 4.29           | 0.001   | KC861672         | 0            | Chlorophyta        | <i>Coelastrella ellipsoidea</i>     |
| OTU 11 | 0         | 53.35  | 1.97           | 0.001   | EF100355         | 6.3          | Ochrophyta         | <i>uncultured Paraphysomonas</i>    |
| OTU 14 | 51.1      | 0      | 1.88           | 0.001   | HM135075         | 0.3          | Chlorophyta        | <i>uncultured Monomastix</i>        |
| OTU 22 | 1.3       | 46.85  | 1.72           | 0.007   | FR865749         | 0            | Chlorophyta        | <i>Chaetophora incrassata</i>       |
| OTU 12 | 7.25      | 43.6   | 1.61           | 0.04    | AB491653         | 5.6          | Chlorophyta        | <i>Monomastix minuta</i>            |
| OTU 13 | 41.5      | 0.05   | 1.53           | 0.001   | GU067985         | 0            | Charophyta         | <i>uncultured Chaetosphaeridium</i> |
| OTU 17 | 33.85     | 0.05   | 1.25           | 0.018   | HAFO01005448     | 2.9          | Ochrophyta         | <i>Uroglena WA34KE</i>              |
| OTU 21 | 33.2      | 0      | 1.22           | 0.001   | AB771832         | 4.7          | Ochrophyta         | <i>uncultured Chrysophyceae</i>     |
| OTU 16 | 31.05     | 0.1    | 1.14           | 0.004   | EF443138         | 7.1          | Chytridiomycota    | <i>Clydaea vesicula</i>             |
| OTU 18 | 29.6      | 1.25   | 1.09           | 0.005   | HM135093         | 4.6          |                    | <i>uncultured Bicosoecida</i>       |
| OTU 29 | 28.75     | 0      | 1.06           | 0.001   | HF549063         | 5.8          | Ochrophyta         | <i>Tesselaria lapponica</i>         |

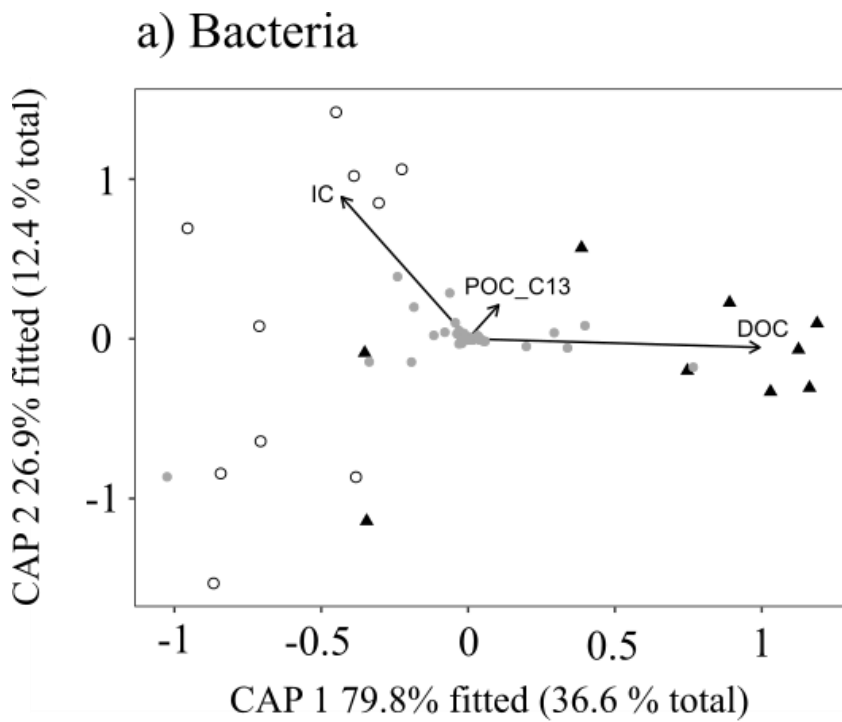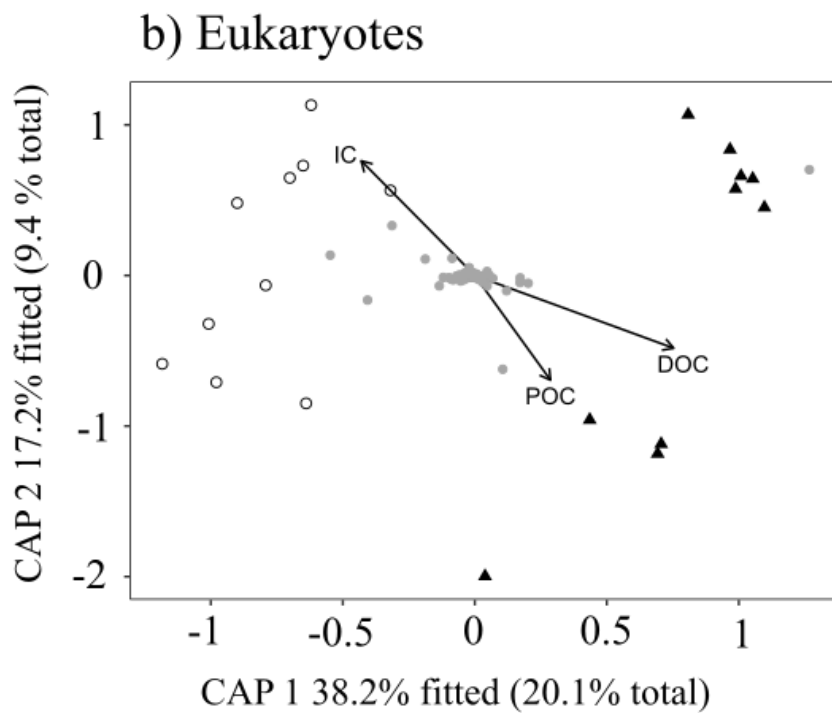

- Polygonal
- ▲ Trough

**Figure S5:** db-RDA of the a) bacterial b) micro-eukaryotic communities. Shaded points represent the OTUs and arrows represent significant environmental parameters. On the axis, the percentage of inertia is represented for the fitted model and for the total inertia. Pond B05 was excluded from the analysis of the bacterial communities.

a)

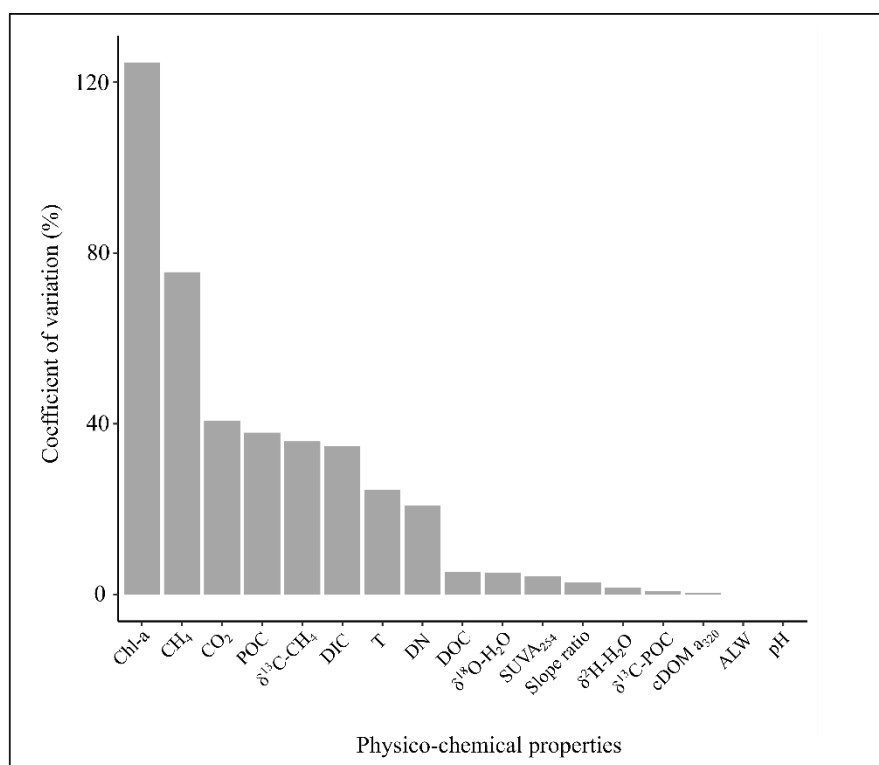

b)

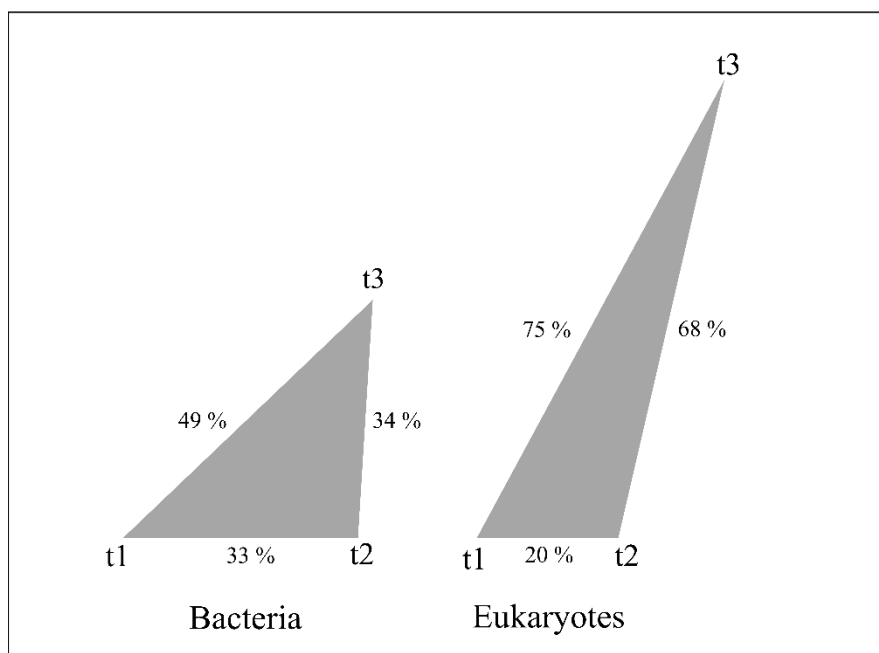

**Figure S6:** a) Coefficient of variation of the physico-chemical properties in pond B01 from the three sampling dates: t1: 13/07/2018, t2: 17/07/2018, t3: 23/07/2018. Abbreviations are described in Table 1. b) Bray-Curtis dissimilarity for the prokaryotic and eukaryotic communities for the 3 sampling dates.
